**S1 Table. Significant independent-samples t-tests for gender.**

| Survey Item                                                                                                                             | Males ( <i>n</i> = 35) |           | Females ( <i>n</i> = 130) |           | <i>t</i> | <i>p</i> | <i>d</i> |
|-----------------------------------------------------------------------------------------------------------------------------------------|------------------------|-----------|---------------------------|-----------|----------|----------|----------|
|                                                                                                                                         | <i>M</i>               | <i>SD</i> | <i>M</i>                  | <i>SD</i> |          |          |          |
| Harm reduction is a practical, realistic approach that does not encourage substance use.                                                | 1.83                   | 0.79      | 1.57                      | 0.63      | 2.03     | .044*    | 0.39     |
| Teaching youth about safer substance use will encourage them to use substances.                                                         | 2.80                   | 0.76      | 3.10                      | 0.66      | -2.32    | .022*    | -0.44    |
| I would be comfortable providing support to a student who had consumed cannabis on school grounds:                                      | 1.65                   | 0.88      | 2.04                      | 0.91      | -2.25    | .026*    | -0.43    |
| I would be comfortable providing support to a student who had consumed an unregulated substance (e.g., cocaine, LSD) on school grounds: | 2.06                   | 1.07      | 2.51                      | 1.03      | -2.23    | .027*    | -0.43    |
| In the event that students are found using cannabis on the school grounds, the appropriate process to follow is clear.                  | 2.43                   | 0.81      | 2.77                      | 0.87      | -2.05    | .042*    | -0.39    |

Lower score indicates greater agreement with survey item.

\* $p < .05$ , \*\* $p < .01$ , \*\*\* $p < .001$
